# Supplementary material for: Algorithmic Content Curation, Immersive User Engagement, and the Content-Platform-Social Interface: A Multivariate Examination of Consumption Determinants among Generation Z within China’s Digitally Evolved Media Ecosystem
Source: Research Square preprint supplement (doi:10.21203/rs.3.rs-6823843/v1), 2025-11-24
Supplement: Supplementary file 1 [file 927df062c5cbe8ac1f48f1db.docx]

**Appendix**

**Informed Consent Form**

To: Name

Thank you for your interest!

This is a survey regarding digital media consumption, which has been approved by the Ethics Committee of Shanxi University of Applied Sciences (Approval No.: SCAST.2025.03.A16). Therefore, if you are willing, please feel free to participate in the experiment. If you wish to participate, please confirm the following statements to acknowledge your consent. If you do not agree, you may decline to participate in the survey.

I understand: My participation is voluntary, and I can withdraw at any time without providing any reason, and there will be no negative consequences.

I understand: The duration of this survey, and I can ask questions during the experiment if I am unsure of the experimental requirements.

I ensure: To cooperate with all reasonable survey requirements and complete the survey experiment seriously.

I understand: The data and information obtained in the survey will only be used for scientific research purposes and will not be used for any news or commercial purposes.

I understand: My behavioral responses and personal information will be kept strictly confidential.

I understand: My name will not be associated with the research materials, nor will it be identified or confirmed in the research report.

I understand: After the survey is completed, participation is voluntary, and there will be no additional compensation, nor will any further financial requests be made in the future.

I agree: To store my anonymized data during and after the research for future research, including publications related to this study.

Note: The interpretation of this informed consent form belongs to Shanxi University of Applied Sciences.

Copy: Once the participant signs, the participant should receive a copy of the signed and dated participant consent form. A copy of the signed and dated consent form should also be placed in the main project file and must be properly kept.

Participant Name: (signature)

Date of Survey Participation:
